# Supplementary material
Source: PubMed Central journal article supplement (PMC4221875)
Supplement: ac5030914_si_001.pdf [file ac5030914_si_001.pdf]

# Correlated Imaging with C<sub>60</sub>-SIMS and Confocal Raman Microscopy: Visualization of Cell-Scale Molecular Distributions in a Bacterial Biofilm

Eric J. Lanni<sup>1</sup>, Rachel N. Masyuko<sup>2</sup>, Callan M. Driscoll<sup>3</sup>, Sage J. B. Dunham<sup>1</sup>, Joshua D. ShROUT<sup>3</sup>, Paul W. Bohn<sup>2</sup>, Jonathan V. Sweedler<sup>1</sup>

<sup>1</sup> Department of Chemistry and Beckman Institute for Advanced Science and Technology, University of Illinois at Urbana-Champaign, Urbana, IL 61801

<sup>2</sup> Department of Chemistry and Biochemistry and Department of Chemical and Biomolecular Engineering, University of Notre Dame, Notre Dame, IN 46556

<sup>3</sup> Department of Civil and Environmental Engineering and Earth Sciences and Department of Biological Sciences, University of Notre Dame, Notre Dame, IN 46556

## Supporting Information

**Figure S1.** Raman spectra of quinolone standards.

**Table S1.** Putative metabolites detected on *P. aeruginosa* biofilm.

**Figure S2.** C<sub>60</sub>-SIMS tandem MS spectra for metabolites identified on *P. aeruginosa* biofilm.

**Figure S3.** Full C<sub>60</sub>-SIMS images of metabolites detected in Figure 4 region of interest (ROI).

**Figure S4.** Spatial co-location of characteristic fragment ions with parent quinolone classes in Figure 4 ROI.

**Figure S5.** Low resolution SEM image of Figure 5 ROI.

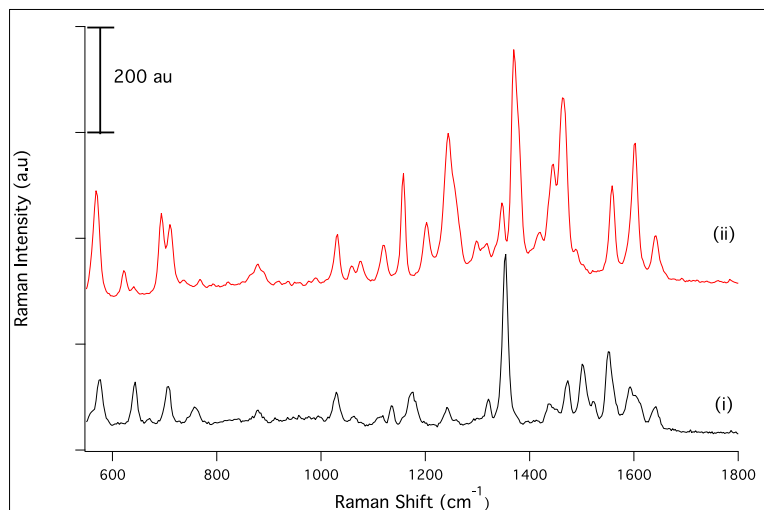

**Figure S1. Raman spectra of quinolone standards.** Raman spectra of quinolones (i) HHQ and (ii) PQS are uniquely characterized by contributions from ring deformation, ring breathing and ring stretching vibrations. Ring deformation vibrations are represented by the bands at  $431\text{ cm}^{-1}$ ,  $490\text{ cm}^{-1}$  and  $570\text{ cm}^{-1}$  in PQS and at  $489\text{ cm}^{-1}$ ,  $573\text{ cm}^{-1}$ ,  $642\text{ cm}^{-1}$  and  $753\text{ cm}^{-1}$  in HHQ.<sup>1,2</sup> The band at  $1031\text{ cm}^{-1}$  in both PQS and HHQ is indicative of ring breathing vibrations. The bands found in the  $1300\text{ -}1600\text{ cm}^{-1}$  region of the spectrum are characteristic of ring stretching vibrations which are associated with intense bands. In the PQS spectrum the major bands in this region are at  $1371\text{ cm}^{-1}$ , assigned to the C-C stretching vibrations of the quinolone ring with contributions from CH bending vibrations,<sup>1-3</sup>  $1557\text{ cm}^{-1}$  attributed to (C-C-C) and (C-N-C) ring stretching vibrations,<sup>1,2</sup> and at  $1603\text{ cm}^{-1}$  assigned to symmetric C=C stretching vibrations of the quinolone ring.<sup>1,2</sup> In HHQ, the major bands are at  $1353\text{ cm}^{-1}$  arising from C-C stretching vibrations of the quinolone ring with contributions from CH bending vibrations,<sup>1,4</sup>  $1553\text{ cm}^{-1}$  attributed to (C-C-C) and (C-N-C) ring stretching vibrations,<sup>1</sup>  $1501\text{ cm}^{-1}$  and  $1593\text{ cm}^{-1}$  assigned to (C-C-C) and symmetric C=C ring stretching vibrations.<sup>1</sup> Other significant bands characterized by non-ring vibrations in PQS are  $1158\text{ cm}^{-1}$  from CH bending vibrations<sup>1,4</sup> and  $1245\text{ cm}^{-1}$  attributed to contributions from CH bending and CH twisting vibrations.<sup>4</sup> In HHQ, bands at  $1173\text{ cm}^{-1}$  and  $1239\text{ cm}^{-1}$  mark similar vibrations.<sup>1,4</sup>  $\text{CH}_2$  deformation vibrations are observed at  $1464\text{ cm}^{-1}$  and  $1471\text{ cm}^{-1}$  in PQS and HHQ, respectively.<sup>1,5,6</sup>

| Compound ID                                                        | Molecular formula                                | M <sub>ex</sub> | [M+H] <sup>+</sup> theoretical | [M+H] <sup>+</sup> observed | ΔM    |
|--------------------------------------------------------------------|--------------------------------------------------|-----------------|--------------------------------|-----------------------------|-------|
| 4-quinolone frag.                                                  | C <sub>10</sub> H <sub>9</sub> NO                | 159.07          | -                              | 159.07*                     | 0.00  |
| 3-hydroxyquinolone frag.                                           | C <sub>10</sub> H <sub>9</sub> NO <sub>2</sub>   | 175.06          | -                              | 175.07*                     | 0.01  |
| 4-quinolone frag.                                                  | C <sub>11</sub> H <sub>10</sub> NO               | 172.08          | -                              | 172.08*                     | 0.00  |
| 3-hydroxyquinolone frag.                                           | C <sub>11</sub> H <sub>10</sub> NO <sub>2</sub>  | 188.07          | -                              | 188.07*                     | 0.00  |
| <b>PC (phosphocholine)</b>                                         | C <sub>5</sub> H <sub>15</sub> NO <sub>4</sub> P | 184.07          | -                              | 184.08*                     | 0.01  |
| 1-HP (1-hydroxyphenazine)                                          | C <sub>12</sub> H <sub>8</sub> N <sub>2</sub> O  | 196.06          | 197.07                         | 197.09                      | 0.02  |
| 1-MP (1-methoxyphenazine)                                          | C <sub>13</sub> H <sub>10</sub> N <sub>2</sub> O | 210.08          | 211.09                         | 211.10                      | 0.01  |
| <b>HHQ (2-heptyl-4-quinolone)</b>                                  | C <sub>16</sub> H <sub>21</sub> NO               | 243.16          | 244.17                         | 244.17                      | 0.00  |
| <b>PQS (2-heptyl-3-hydroxyquinolone)</b>                           | C <sub>16</sub> H <sub>21</sub> NO <sub>2</sub>  | 259.16          | 260.17                         | 260.17                      | 0.00  |
| <b>HQNO (4-hydroxy-2-heptylquinolone-N-oxide)</b>                  | C <sub>16</sub> H <sub>21</sub> NO <sub>2</sub>  | 259.16          | 260.17                         | 260.17                      | 0.00  |
| <b>C<sub>9:1</sub>-NHQ (2-nonenyl-4-quinolone)</b>                 | C <sub>18</sub> H <sub>23</sub> NO               | 269.18          | 270.19                         | 270.19                      | 0.00  |
| <b>NHQ (2-nonyl-4-quinolone)</b>                                   | C <sub>18</sub> H <sub>25</sub> NO               | 271.19          | 272.20                         | 272.19                      | -0.01 |
| <b>C<sub>9:1</sub>-NQNO (4-hydroxy-2-nonenylquinolone-N-oxide)</b> | C <sub>18</sub> H <sub>23</sub> NO <sub>2</sub>  | 285.17          | 286.18                         | 286.19                      | 0.01  |
| <b>C<sub>9</sub>-PQS (2-nonyl-3-hydroxyquinolone)</b>              | C <sub>18</sub> H <sub>25</sub> NO <sub>2</sub>  | 287.19          | 288.20                         | 288.20                      | 0.00  |
| <b>C<sub>9</sub>-NQNO (4-hydroxy-2-nonylquinolone-N-oxide)</b>     | C <sub>18</sub> H <sub>25</sub> NO <sub>2</sub>  | 287.19          | 288.20                         | 288.20                      | 0.00  |
| <b>C<sub>11:1</sub>-UHQ (2-undecenyl-4-quinolone)</b>              | C <sub>20</sub> H <sub>27</sub> NO               | 297.21          | 298.22                         | 298.22                      | 0.00  |

**Table S1. Mass list for metabolites detected by C<sub>60</sub>-SIMS analysis of *P. aeruginosa* biofilm.**

Compounds listed in bold typeface were confirmed with *in situ* tandem MS (spectra shown in Figure S3). \* Indicates fragment ion detected as M<sup>+</sup> or M<sup>2+</sup>.

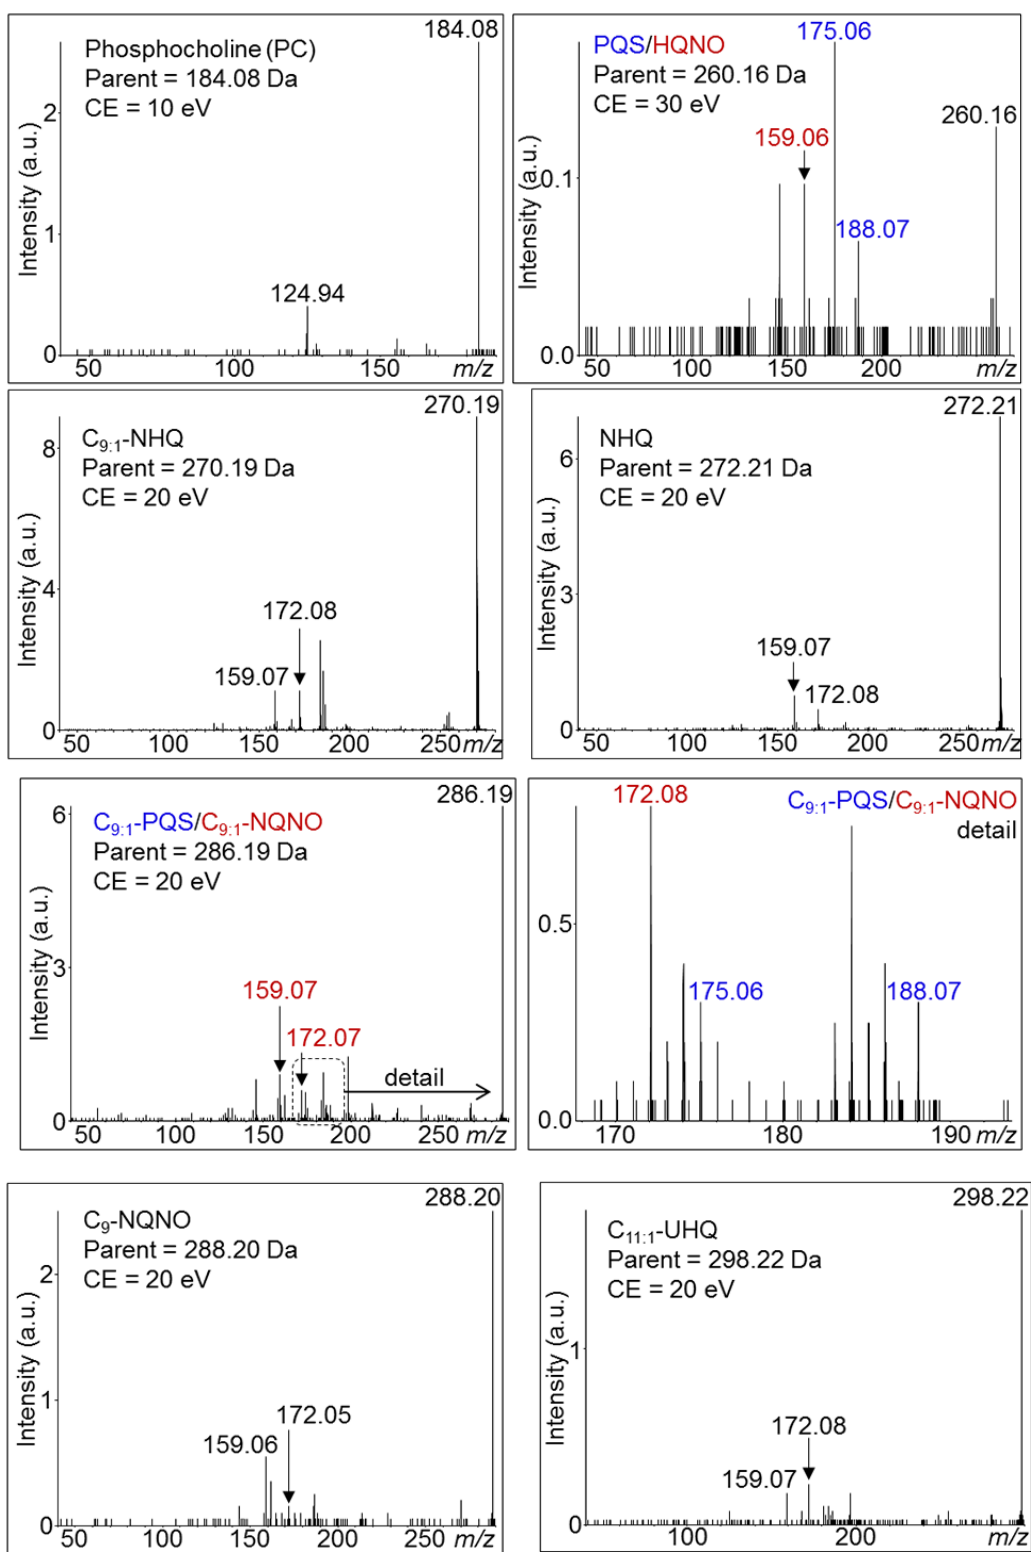

**Figure S2.**  $C_{60}$ -SIMS tandem MS spectra of biofilm metabolites. Spectra were collected directly from the untreated biofilm surface. Characteristic fragment ions matching those reported in previous work<sup>7</sup> are labeled in the spectra and color-coded in cases of isobaric species.

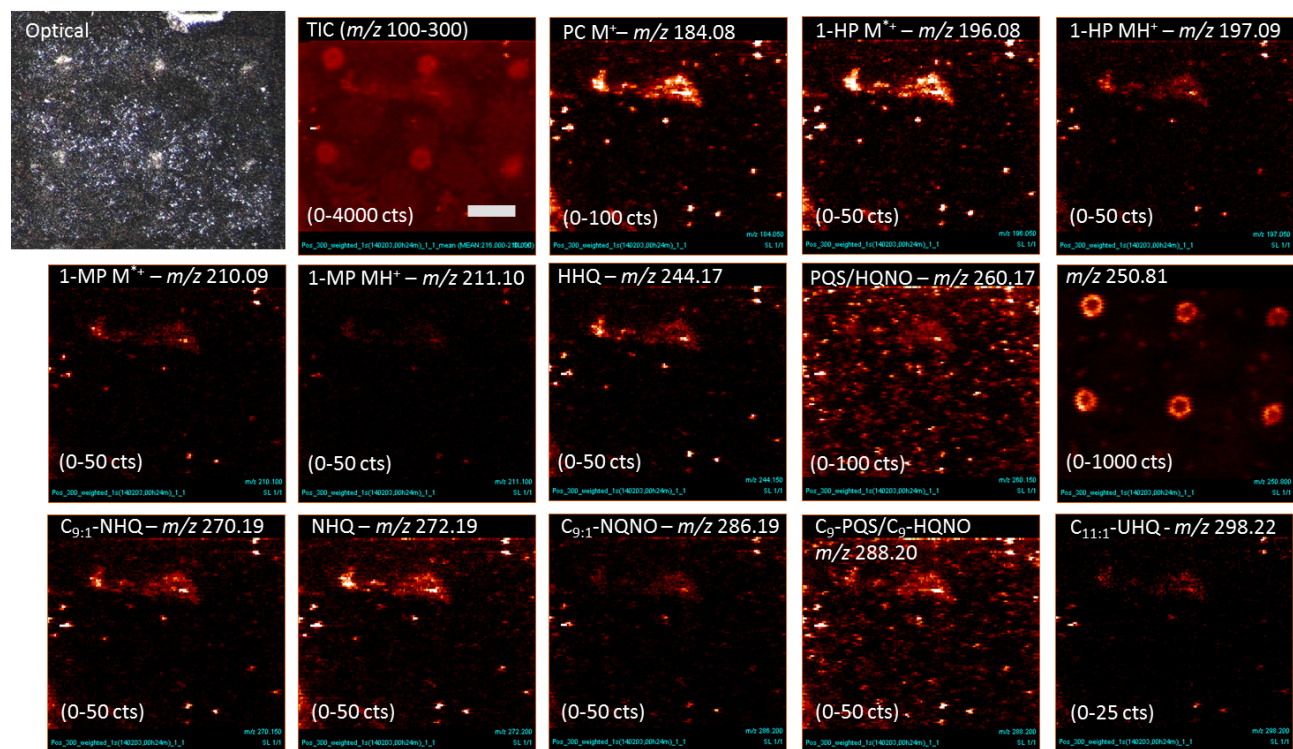

**Figure S3.** Full  $C_{60}$ -SIMS images of metabolites detected in Fig. 4 ROI. Scale bar = 250  $\mu$ m.

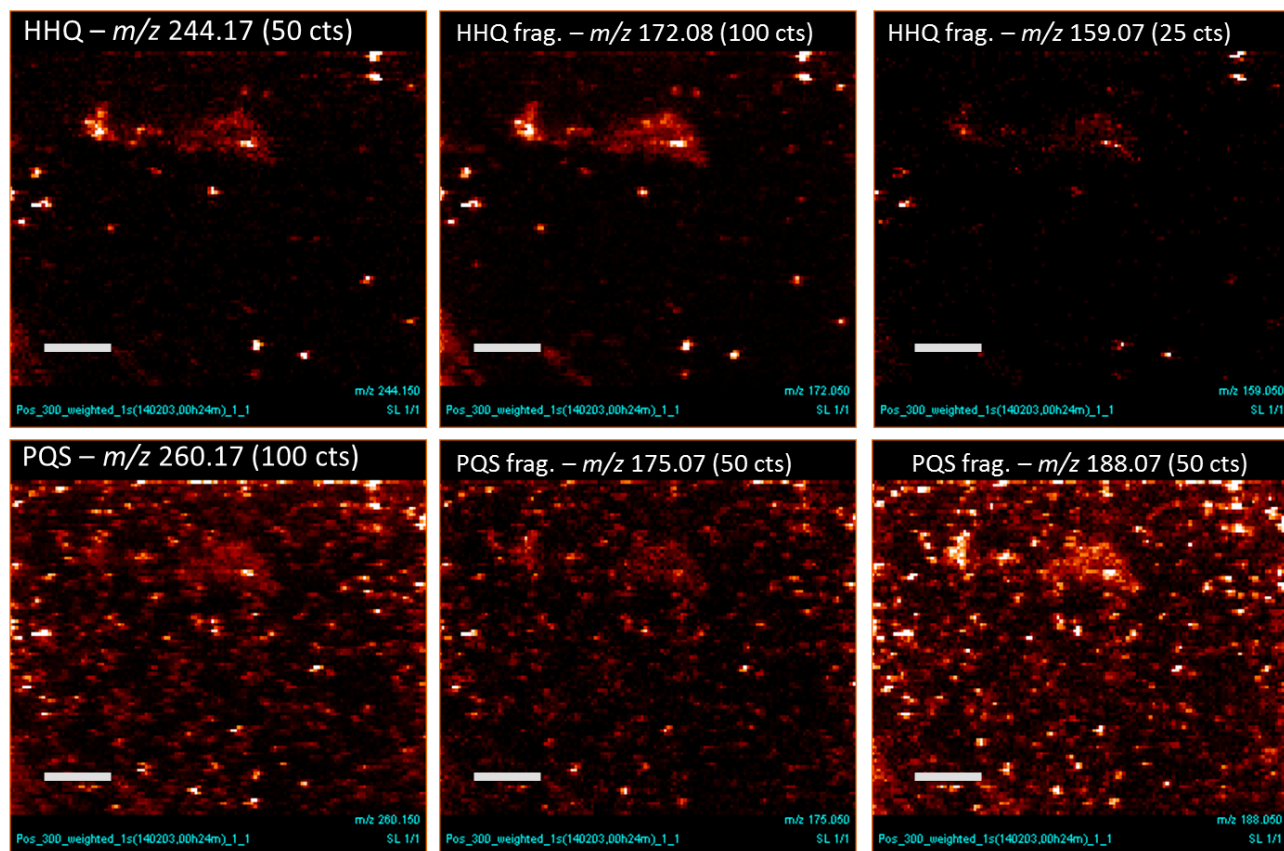

**Figure S4. Spatial co-location of characteristic fragment ions with parent quinolone classes in Fig. 4 ROI.** 4-quinolone HHQ and characteristic fragments  $m/z$  172/159 show good agreement of spatial localization throughout the imaged region, likewise the 3-hydroxy-4-quinolone PQS and characteristic fragments  $m/z$  175/188 are co-localized differently. Scale bars = 200  $\mu\text{m}$ .

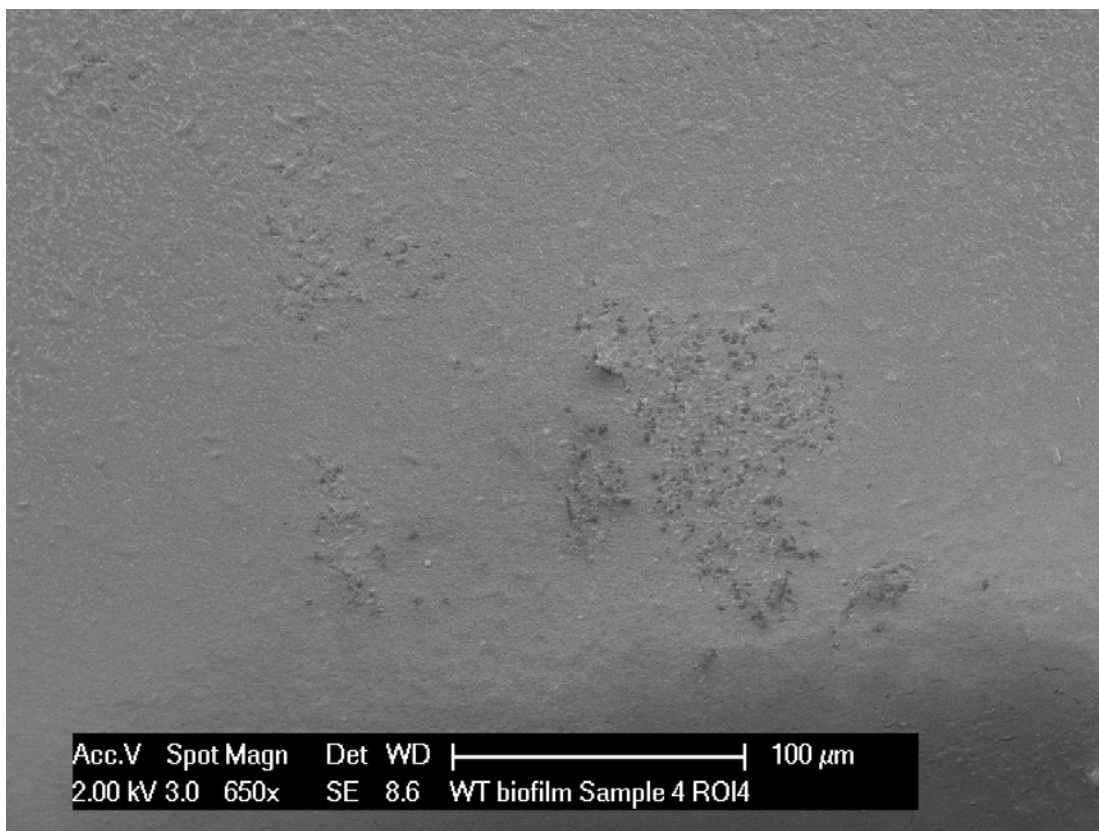

**Figure S5: Low resolution SEM image of Figure 5 ROI.** An electron micrograph of the region around the “quinolone hot spot” shown in Figure 5 shows smooth biofilm surface elsewhere, compared with a coarser texture and visible individual cells in the region of intense quinolone (and phosphocholine) signal.

## References

- (1) Bolboaca, M.; Kiefer, W.; Popp, J. *J. Raman Spectrosc.* **2002**, *33*, 207-212.
- (2) Frosch, T.; Schmitt, M.; Popp, J. *Anal. Bioanal. Chem.* **2007**, *387*, 1749-1757.
- (3) Neugebauer, U.; Szeghalmi, A.; Schmitt, M.; Kiefer, W.; Popp, J.; Holzgrabe, U. *Spectrochim. Acta. A. Mol. Biomol. Spectrosc.* **2005**, *61*, 1505-1517.
- (4) Wang, Y.; Yu, K.; Wang, S. *Spectrochim. Acta. A. Mol. Biomol. Spectrosc.* **2006**, *65*, 159-163.
- (5) Harz, M.; Rosch, P.; Peschke, K. D.; Ronneberger, O.; Burkhardt, H.; Popp, J. *Analyst* **2005**, *130*, 1543-1550.
- (6) Neugebauer, U.; Schmid, U.; Baumann, K.; Ziebuhr, W.; Kozitskaya, S.; Deckert, V.; Schmitt, M.; Popp, J. *ChemPhysChem.* **2007**, *8*, 124-137.
- (7) Lépine, F.; Milot, S.; Déziel, E.; He, J.; Rahme, L. G. *J. Am. Soc. Mass Spectrom.* **2004**, *15*, 862-869.
